# Supplementary material
Source: Research Square preprint supplement (doi:10.21203/rs.3.rs-8578714/v1)
Supplement: Supplementary file 1 [file 3dce1d641b8f25c21aaf2685.docx]

**Supplementary figures and figure legends**

**
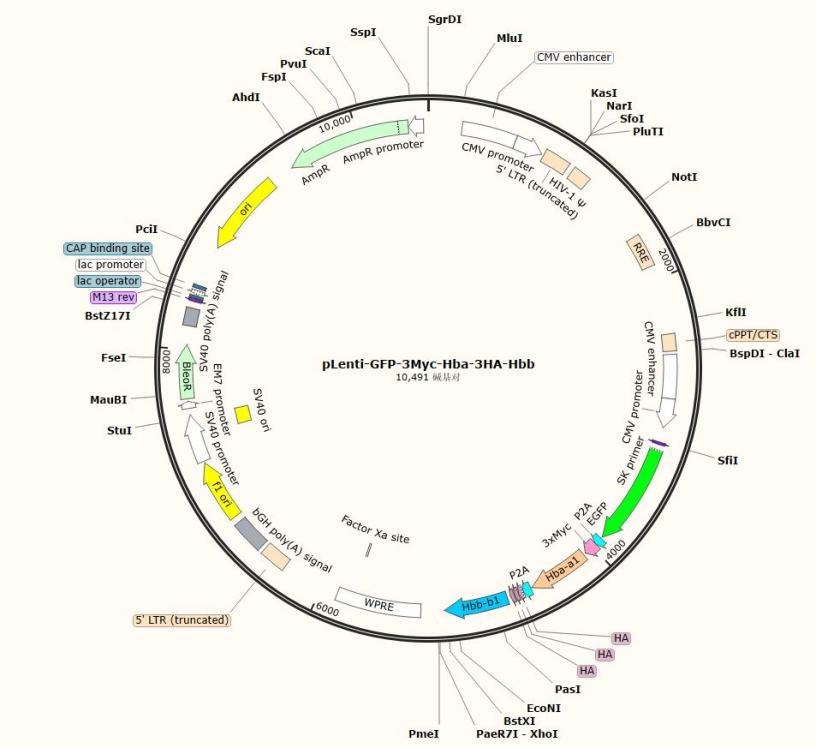
**

**Supplementary Figure 1. Plasmid map of pLenti-GFP-3Myc-Hbα-3HA-Hbβ.**

**
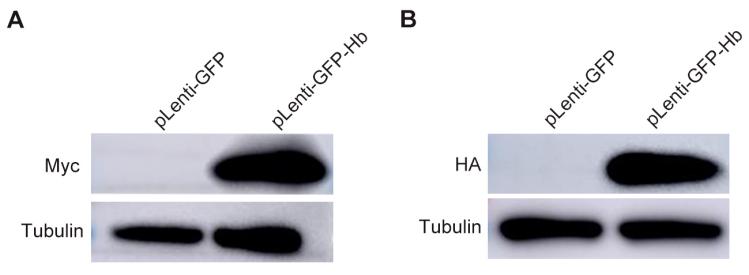
**

**Supplementary Figure 2. Detection of hemoglobin α and β subunits expression by Western blot.** (A-B) Western blot analysis of hemoglobin α and β using anti-Myc (A) and Anti-HA (B) antibodies .

**
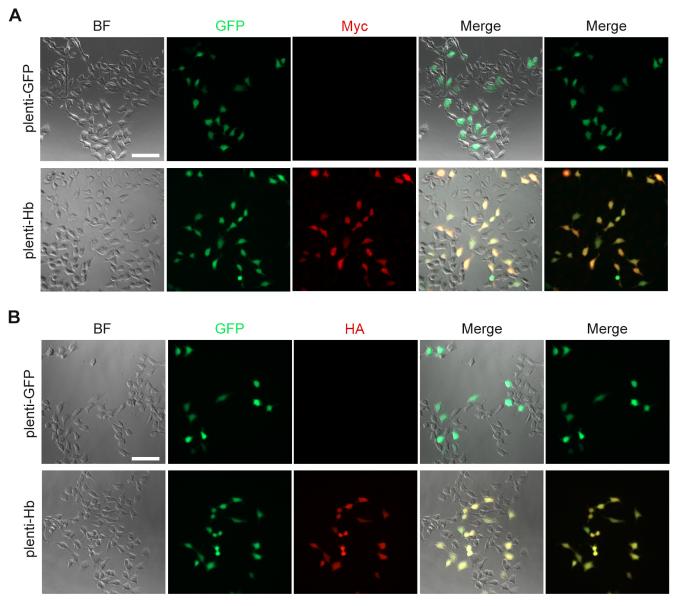
**

**Supplementary Figure 3. Detection of hemoglobin α and β subunits expression by immunofluorescence staining.** (A-B) Immunofluorescence staining of hemoglobin α and β using anti- Myc (A) and anti-HA (B) antibodies in infected HEK293 cells.


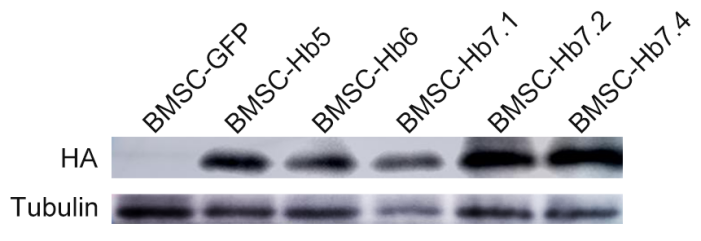


**Supplementary Figure 4. Detection of hemoglobin expression in selected monoclonal cell lines by western blot.**


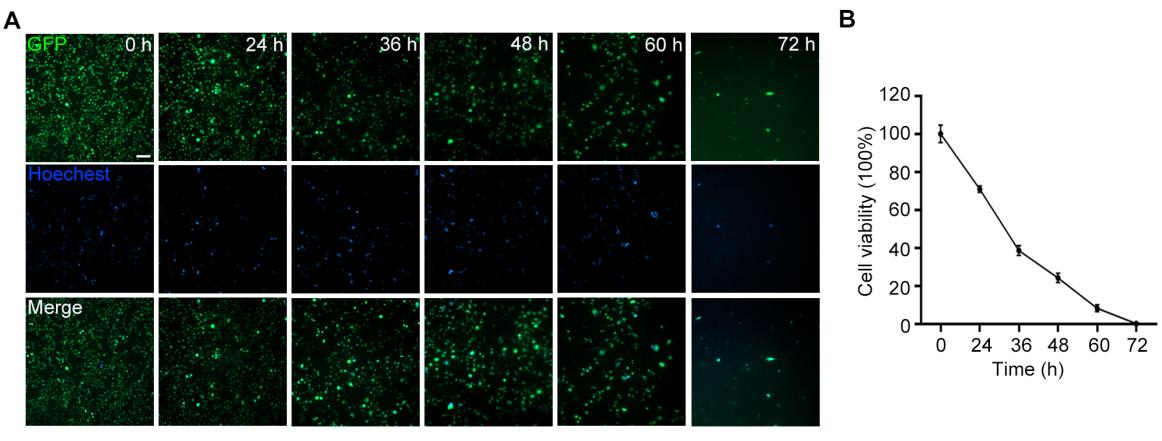


**Supplementary Figure 5. Viability of enucleated BMSC-GFP cells.** (A) Fluorescence signals of BMSC-GFP cells at different time points after enucleation. Scale bar, 200 μm. (B) Cell viability of enucleated BMSC-GFP at different time points.
